# Supplementary material
Source: ML conference proceedings conference paper supplement (https://openaccess.thecvf.com/content/CVPR2023/html/Lin_Memory-Friendly_Scalable_Super-Resolution_CVPR_2023_paper.html)
Supplement: Supplementary file 1 [file Lin_Memory-Friendly_Scalable_Super-Resolution_CVPR_2023_supplemental.pdf]

## Supplementary for Memory-friendly Scalable Super-resolution via Rewinding Lottery Ticket Hypothesis

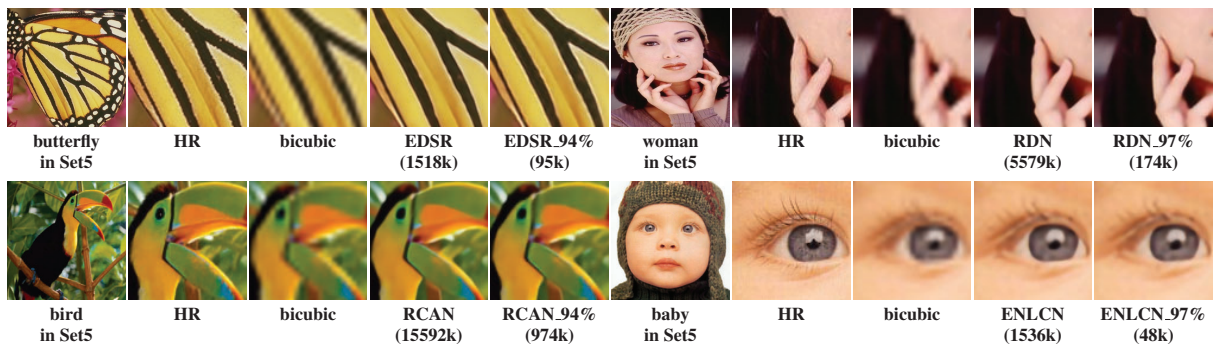

Figure 1. Visual comparisons of other SR models with IMP-SSD on Set5 for 4x SR.

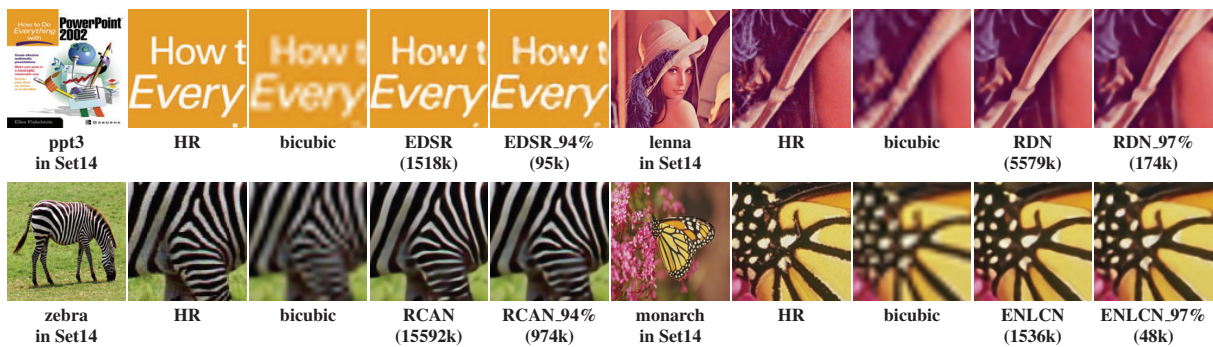

Figure 2. Visual comparisons of other SR models with IMP-SSD on Set14 for 4x SR.

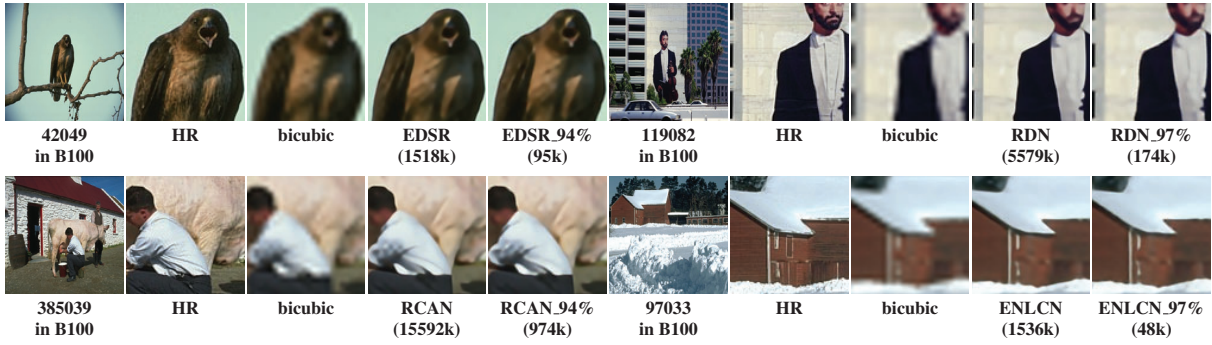

Figure 3. Visual comparisons of other SR models with IMP-SSD on B100 for  $4\times$  SR.

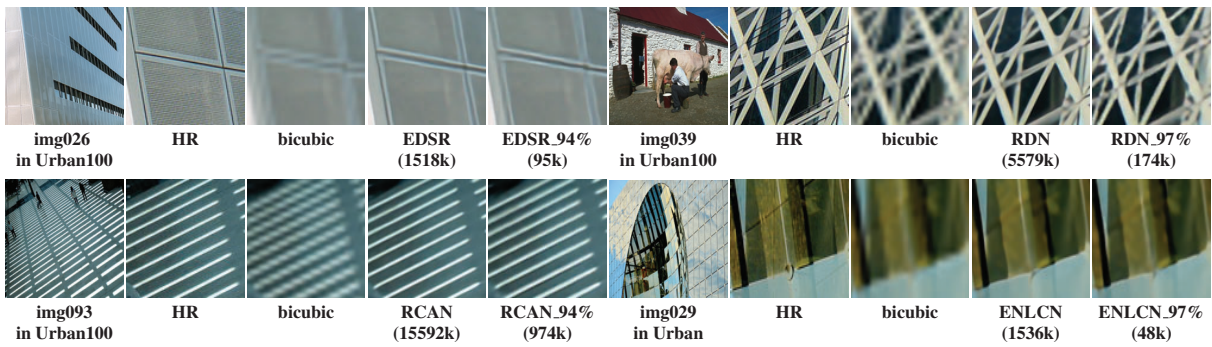

Figure 4. Visual comparisons of other SR models with IMP-SSD on Urban100 for  $4\times$  SR.
